# Supplementary material for: Changes in Methylation across Structural and MicroRNA Genes Relevant for Progression and Metastasis in Colorectal Cancer
Source: MDPI journal article supplement (doi:10.3390/cancers13235951), 2021-11-26
Supplement: s1 [file s1]

**Table S1.** Clinical pathological characteristics of the tumour samples used for the methylation analysis. pT, pN, M stipulates the tumour node metastasis classification of the UICC, G reflects the tumour's grade of differentiation. All tumours were microsatellite stable.

| Samples No | Gender | Tumor type    | Stage | pT              | pN           | G            | M  |
|------------|--------|---------------|-------|-----------------|--------------|--------------|----|
| 1          | Female | Colon         | 2     | 3               | 0            | 2            | 0  |
| 2          | Male   | Colon         | 4     | 4               | 2            | 2            | 1  |
| 3          | Male   | Colon         | 2     | 3               | 0            | 2            | 0  |
| 4          | Male   | Colon         | 2     | 3               | 0            | 2            | 0  |
| 5          | Male   | Colon         | 2     | 3               | 0            | 2            | 0  |
| 6          | Female | Colon         | 3     | 3               | 0            | 2            | MX |
| 7          | Male   | Rectum/Sigma  | 1     | pT2/<br>Sig.pT1 | pN0 /Sig.pN0 | G2/ Sig.G1/2 | M0 |
| 8          | Female | Rectum        | 3     | 4               | 1            | 2            | M0 |
| 9          | Male   | Colon         | 3     | 3               | 2            | 3            | M0 |
| 10         | Female | Sigma         | 4     | 3               | 2            | 3            | 1  |
| 11         | Male   | Rectum        | 1     | 2               | 0            | 2            | 0  |
| 12         | Male   | Rectum        | 3     | 2               | 1            | 3            | 0  |
| 13         | Female | Rectum        | 4     | 3               | 2            | 2            | 1  |
| 14         | Male   | Rectum        | 2     | 4               | 0            | 2            | 0  |
| 15         | Male   | Sigma         | 3     | 3               | 1            | 2            | 0  |
| 16         | Male   | Colon/Sigma   | 3     | 4               | 2            | 3            | 0  |
| 17         | Female | Colon         | 4     | 3               | 2            | 3            | 1  |
| 18         | Female | Recto-sigmoid | 2     | 3               | 0            | 2            | 0  |
| 19         | Male   | Colon         | 1     | 2               | 0            | 2            | 0  |
| 20         | Male   | Colon         | 4     | 1               | 1            | 2            | 1  |
| 21         | Male   | Rectum        | 2     | 3               | 0            | 1            | MX |
| 22         | Female | Colon         | 3     | 3               | 1            | 2            | MX |
| 23         | Male   | Rectum        | 3     | 2               | 2            | 2            | MX |
| 24         | Female | Sigma         | 2     | 3               | 0            | 2            | MX |
